# Supplementary material
Source: publisher site journal article supplement (https://www.spandidos-publications.com/7593/downloadSupplementary)
Supplement: Supplementary file 1 [file downloadSupplementary]

Table SI. Performance of model 4 in different subgroups.

| A, Internal test set |    |       |
|----------------------|----|-------|
| Subgroup             | n  | AUC   |
| Tumor location       |    |       |
| Central lung         | 10 | 0.920 |
| Peripheral lung      | 50 | 0.920 |
| T stage              |    |       |
| T2-                  | 44 | 0.919 |
| T3+                  | 16 | 0.857 |
| Atelectasis          |    |       |
| Yes                  | 8  | 0.875 |
| No                   | 52 | 0.932 |
| B, External test set |    |       |
| Subgroup             | n  | AUC   |
| Tumor location       |    |       |
| Central lung         | 32 | 0.961 |
| Peripheral lung      | 58 | 0.902 |
| T stage              |    |       |
| T2-                  | 76 | 0.927 |
| T3+                  | 14 | 0.889 |
| Atelectasis          |    |       |
| Yes                  | 13 | 0.976 |
| No                   | 77 | 0.920 |

AUC, area under the curve; T, tumor.
